# Supplementary material for: Pathophysiology of Influenza D Virus Infection in Specific-Pathogen-Free Lambs with or without Prior Mycoplasma ovipneumoniae Exposure
Source: MDPI journal article supplement (doi:10.3390/v14071422), 2022-06-28
Supplement: s1 [file s1]

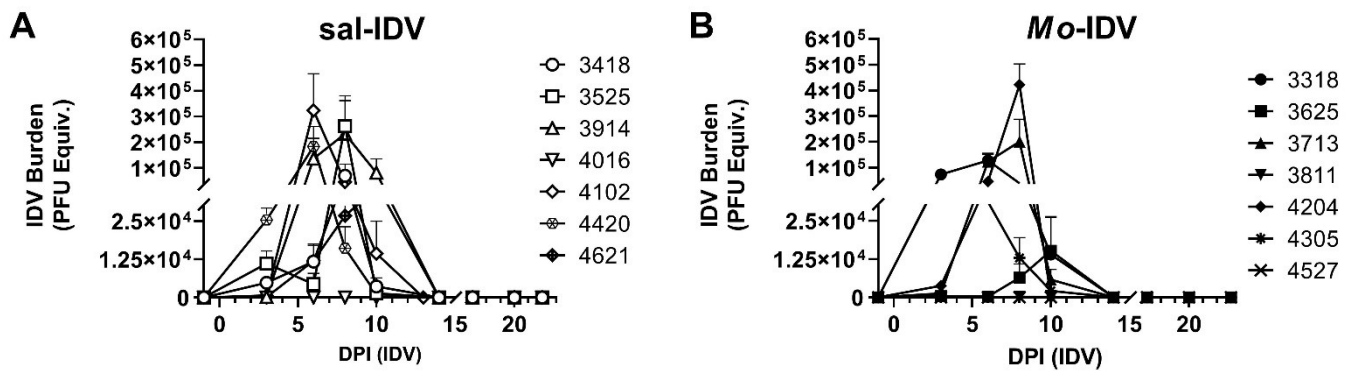

**Figure S1.** IDV nasal shedding patterns in SPF lambs varies within both experimental groups. IDV burden per nasal swab for individual lambs in (A) the sal-IDV group, or (B) the Mo-IDV group. Data presented as mean of technical replicates  $\pm$  SD. Enumerated by qRT-PCR using the standard curve method.
